# Supplementary material
Source: publisher figshare collection journal article supplement (https://sage.figshare.com/ndownloader/files/13276757)
Supplement: Supplementary file 1 [file 13276757]

**Supplementary material 1**

*Multimorbidity and mortality: a 15-year longitudinal registry-based nationwide Danish population study*

**Definition of Multimorbidity**

In this article multimorbidity was defined in to steps

1. Selection of diagnoses
2. Grouping of diagnoses according to different systems of the body

Selection of diagnoses

By this definition of multimorbidity we aim to have a simple and clinically relevant definition that at the same time is able to embrace complexity. Therefore, the definition is organized according to clinical picture rather than disease etiology. Diagnoses are considered on the basis of the following criteria:

- Diagnoses with high prevalence in the Danish population. (Risk factors are not included because of the low completeness of this information in the registers)
- Diagnoses relevant for general practice
- Diagnoses causing severe loss of function and/or loss of quality of life
- Diagnoses combined with reduced life expectancy
- Diagnoses resulting in a considerable treatment burden for the patient
- Chronic conditions (e.g. conditions that ”require ongoing management over a period of years or decades”([1](#_ENREF_1))).

Congenital diseases are not included.

Grouping of diagnoses according to different systems of the body

To have multimorbidity, a patient has to have a least one diagnosis from each of two different groups of diagnoses. E.g., if a patient has asthma and COPD this patient is categorized as lung sick instead of multimorbid. This choice rests on the assumption that it is more complex from an organizational and physiological point of view if the patient suffers from diagnoses from different bodily systems. Furthermore, concordant conditions (conditions with overlapping pathophysiology and management) are intended to be gathered in the same group ([2](#_ENREF_2)). However, diabetes and cardiovascular diseases which could be expected to share both pathophysiology and risk factors are distributed over two different groups because they after all have different clinical manifestations and different treatments. The grouping of diagnoses and count of bodily system morbidity instead of single diagnoses may better relate to the way health care is organized as well as to the complexity and burden of morbidity ([3](#_ENREF_3)).

See table A below for the selected diagnoses and bodily systems.

Background for redefining multimorbidity

In the literature the variation in how to define multimorbidity is large and the lack of consensus is evident ([4-6](#_ENREF_4)). Most studies on multimorbidity include diagnoses based on the argument that the diagnoses are common ([6](#_ENREF_6)). However, if only selecting diagnoses based on prevalence there would be a risk of excluding many relevant conditions. In some studies authors selected a limited number of diagnoses thoroughly ([7](#_ENREF_7)), others included all chronic ICPC codes ([8](#_ENREF_8)), or selected specific chronic diagnoses from ICPC ([9](#_ENREF_9), [10](#_ENREF_10)). Others selected all existing ICD-10 codes without further explanation ([11](#_ENREF_11)) or let the diagnoses count for the chapter in the ICD-10 system they came from ([12](#_ENREF_12)). Some authors used indices, mainly developed for comorbidity, e.g. Charlson Comorbidity Index (CCI) ([13](#_ENREF_13), [14](#_ENREF_14)) and Cumulative Illness Rating Scale (CIRS) ([15-17](#_ENREF_15)).

We could have included all possible codes from the ICD-10 system. However, doing so would have resulted in some rather small groups of multimorbidity combinations and diagnoses of less importance in relation to prevalence and mortality. To use chapters from ICD-10 could be an option, but some chapters are difficult to apply to the above stated selection criteria. Furthermore, an already existing index could be used. However, CCI was primarily developed for studying one-year mortality and we prefer a broader pallet of diagnoses than they suggest. On the other hand, CIRS could be interesting because it takes severity in to account, nevertheless, this would require access to medical records that were not available in the present register study.

Tonelli et al. ([18](#_ENREF_18)) suggested a panel of 30 conditions when doing research on multimorbidity and their recommendation was based on 40 conditions included in a Scottish study ([7](#_ENREF_7)). Of notice, most diagnoses used in these two studies were also included in our study, with a few exceptions: connective tissue disorders, chronic pain, hypertension, severe constipation, transient ischemic attacks, diverticular disease of intestine, peripheral vascular disease, prostate disorders, chronic sinusitis, learning disability, bronchiectasis and viral hepatitis. The reason for not including these conditions is that some of them are acute rather than chronic, some of them are closely related to other conditions covered by our diagnosis groups, and the validity of the coding in the national registers is relatively low for some of the diagnoses mentioned above. In particular risk factors, like hypertension, are underreported, leading to low completeness and a larger underestimation of these conditions compared with others.

By this definition complexity can be grasped, and prevalent diseases with significant impact on patients’ lives can be included, but without the need of including all possible ICD-10 codes.

Registers

The data was extracted from the following registers:

The Danish National Patient Registry (NPR) ([19](#_ENREF_19))
The Danish Psychiatric Central Research Register (PCRR) ([20](#_ENREF_20))
The Danish Cancer Register (CR) ([21](#_ENREF_21))

The registers contain information solely from the Danish hospital sector. Since we are interested in general medicine it would be optimal to use ICPC codes from primary care. However, there is no access to ICPC codes and there exist no registers validated for research with primary care data in Denmark yet.

All codes are based on International Classification of Diseases, 10th edition (ICD-10) and the earlier 8th edition (ICD-8). ICD is a well-established coding system used in 117 countries and translated into 40 languages. The coding system is based on the medical specialties and hence coded in 21 chapters. The coding system is reliable because of the long history, the many editions with continuous improvements and the involvement of medical experts ([22](#_ENREF_22)). ICD-10 was introduced in Denmark 1 January 1994 and the present study contains both ICD-8 and ICD-10 diagnoses. NPR contains information on all inpatient care contacts in secondary care since 1977 and from 1995 also outpatient and emergency care contacts. Psychiatric diagnoses were included in NPR from 1995 ([19](#_ENREF_19)). ICD-8 and ICD-10 are not comparable in every detail, and this has required a pragmatic approach when selecting diagnoses. In certain cases, one cannot distinguish between acute and chronic diagnoses in ICD-8, which sometimes leads to inclusion of the corresponding broader ICD-10 diagnoses with less relevant subcategories.

The validity and completeness of the registers vary. NPR constantly control data received from hospitals for incorrect codes and inconsistencies between sex and diagnoses in order to increase validity and completeness. Validation studies have shown variation in positive predictive value (PPV) between specialties and PPV showed to be higher when including three-number digits in ICD compared to five-number digits ([23](#_ENREF_23)). In our definition of multimorbidity the three digit level is used as the highest level. Moreover, by using groups of conditions the need of high validity of some of the variables is reduced, e.g. whether atrial fibrillation is correctly coded as fibrillation or incorrectly as atrial flutter is of minor importance, since both conditions are included in the same diagnosis group: heart disease.

In our study we included diagnoses from a window ten years back in time from year 2000. Due to this choice some prevalent cases will be mistaken for being incident. The change from ICD-8 to ICD-10 in 1994 will probably lead to a higher number of incident cases around that year ([23](#_ENREF_23)). Since 1994 is placed in the middle of our collection period a larger number of truly prevalent cases will probably be collected before 1994 and a larger number of cases falsely considered being incident in the year after. However, we do not necessarily consider prevalent cases less important than incident. Changes in diagnostic criteria and methods over time may also have affected how to interpret incidence ([19](#_ENREF_19)).

For CR the validity is secured through daily control routines and yearly publications where checks for internal consistency are performed. Furthermore, the register uses several sources e.g. pathology to check their own information leading to high completeness of the register ([21](#_ENREF_21)).

Validation studies on certain diagnoses have turned out well for PCRR ([24](#_ENREF_24), [25](#_ENREF_25)), but a systematic validation of the whole register has never been performed. There exist no private hospitals in Denmark for treating psychiatric patients therefore PCRR has high completeness. It has to be kept in mind, however, that the relatively large number of people treated for psychiatric diagnoses in primary care and at private practicing psychiatrists is not included in the register ([20](#_ENREF_20)).

**Diagnoses and organ systems included in the multimorbidity definition**

|  | | ICD-10 | ICD-8 |
| --- | --- | --- | --- |
| Lung diagnoses (LUNG) | | | |
| COPD | | J44 | 490 |
| Chronic bronchitis | | J41-J42 | 491 |
| Emphysema | | J43 | 492 |
| Asthma | | J45-J46 | 493 |
| Musculoskeletal diagnoses (MUSCULOSKELETAL) | | | |
| Rheumatic diagnoses / arthritis | | L40.5, M05-M07 | 696.09, 712, 715 |
| Arthrosis | | M15-M17 | 713.00-09 |
| Back diagnoses | | M45, M47, M50-M51, M53-M54 | 712.49, 725, 728 |
| Osteoporosis | | M80-M82 | 723.09 |
| Endocrine diagnoses (ENDO) | | | |
| Hypothyroidisme | | E03 | 244 |
| Hyperthyroidisme | | E05 | 242 |
| Diabetes | | E10-E14 | 249-250 |
| Mental diagnoses (MENTAL) | | | |
| Inclusion of all patients registered with a psychiatric diagnose in Psychiatric Central Register (except for patients having only Y - or Z-diagnoses) ([26](#_ENREF_26)) and the following dementia and alcohol-related diagnoses from DNPR: | | | |
| Dementia | G30, G31.8-9, F00, F01, F02.0, F02.3, F03 | | 290, 293 |
| Alcohol | F10.1-F10.9 | | 291, 303 |
| Cancer (CANCER) | | | |
| All diagnoses from CR except C44, non-melanoma skin cancer. | | | |
| Neurological diagnoses (NEURO) | | | |
| Apoplexia cerebri (stroke) | | I60-I64, I69 | 430-431, 433-434, 436-437 |
| Multiple sclerosis | | G35 | 340 |
| Epilepsy | | G40 | 345 |
| Migraine | | G43 | 346 |
| Parkinson disease | | G20 | 342 |
| Gastrointestinal diagnoses (GASTRO) | | | |
| Dyspepsia | | K30 | 536.90-91 |
| Mb. Crohn and colitis ulcerosa | | K50-K51 | 563 |
| Colon irritabile | | K58 | 564.19 |
| Chronic liver disease | | K70-K76 | 571-573 |
| Chronic pancreatitis | | K86.0, K86.1 | 577.10,577.11,577.19 |
| Cardiovascular diagnoses (HEART) | | | |
| Ischemic heart disease | | I20-I25 | 410-413 |
| Heart failure and arrhythmia | | I44.1-7, I45.2-9, I47-I50 | 427.09, 427.19, 427.23-24, 427.90-97, 428 |
| Heart valve diagnoses | | I05-I08, I34-I37 | 394-396, 397.00, 397.01, 424.00-19, 424.90-92 |
| Genitourinary diagnoses (KIDNEY) | | | |
| Chronic kidney disease | | N03-N05, N11-N12, N18-N19, Z49, Z99.2 | 581, 582, 583, 590.09, 590.15, 792 |
| Urinary incontinence | | N39.3-4 | 786.29 |
| Endometriosis | | N80 | 625.30-39 |
| Diagnoses in sensory organs (SENSORY) | | | |
| Glaucoma | | H40 | 375 |
| Blindness and low vision | | H54.0-54.3, H54.7 | 379.09, 379.19 |
| Loss of hearing | | H90.0, H90.2, H90.3, H90.5, H90.6, H90.8, H91 | 388, 389.09, 389.99 |
| Psoriasis | | L40 | 696.10, 696.19 |

**Table A**. In order to have multimorbidity the patient needs at least one diagnosis from two different bodily systems; for instance COPD from LUNG and multiple sclerosis from NEURO.

References

1. WHO. Innovative care for chronic conditions: building blocks for action: global report. Available at: <http://www.who.int/chp/knowledge/publications/iccc_ch1.pdf:> Geneva, Switzerland; 2002.

2. Piette JD, Kerr EA. The impact of comorbid chronic conditions on diabetes care. Diabetes care. 2006;29(3):725-31.

3. Doessing A BV. Care coordination of multimorbidity: a scoping study. J of Comorbidity. 2015;5:15-28.

4. Willadsen TG, Bebe A, Koster-Rasmussen R, et al. The role of diseases, risk factors and symptoms in the definition of multimorbidity - a systematic review. Scand J Prim Health Care. 2016;34(2):112-21.

5. Huntley AL, Johnson R, Purdy S, et al. Measures of multimorbidity and morbidity burden for use in primary care and community settings: a systematic review and guide. AnnFamMed. 2012;10(2):134-41.

6. Diederichs C, Berger K, Bartels DB. The measurement of multiple chronic diseases--a systematic review on existing multimorbidity indices. J GerontolA BiolSciMedSci. 2011;66(3):301-11.

7. Barnett K, Mercer SW, Norbury M, et al. Epidemiology of multimorbidity and implications for health care, research, and medical education: a cross-sectional study. Lancet. 2012;380(9836):37-43.

8. van den Akker M, Buntinx F, Metsemakers JF, et al. Multimorbidity in general practice: prevalence, incidence, and determinants of co-occurring chronic and recurrent diseases. Journal of clinical epidemiology. 1998;51(5):367-75.

9. O'Halloran J, Miller GC, Britt H. Defining chronic conditions for primary care with ICPC-2. Family practice. 2004;21(4):381-6.

10. Rizza A, Kaplan V, Senn O, et al. Age- and gender-related prevalence of multimorbidity in primary care: the Swiss FIRE project. BMC FamPract. 2012;24(13):113.

11. Mazya AL, Eckerblad J, Jaarsma T, et al. The Ambulatory Geriatric Assessment - A Frailty Intervention Trial (AGe-FIT) - A randomised controlled trial aimed to prevent hospital readmissions and functional deterioration in high risk older adults: A study protocol. European Geriatric Medicine. 2013;4(4).

12. Schneider F, Kaplan V, Rodak R, et al. Prevalence of multimorbidity in medical inpatients. Swiss MedWkly. 2012;142:w13533.

13. Charlson ME, Pompei P, Ales KL, et al. A new method of classifying prognostic comorbidity in longitudinal studies: development and validation. Journal of chronic diseases. 1987;40(5):373-83.

14. Van Eijk MS, Van Der Linde H, Buijck B, et al. Predicting prosthetic use in elderly patients after major lower limb amputation. ProsthetOrthotInt. 2012;36(1):45-52.

15. Hudon C, Fortin M, Vanasse A. Cumulative Illness Rating Scale was a reliable and valid index in a family practice context. J ClinEpidemiol. 2005;58(6):603-8.

16. Linn BS, Linn MW, Gurel L. Cumulative illness rating scale. Journal of the American Geriatrics Society. 1968;16(5):622-6.

17. Fortin M, Dubois MF, Hudon C, et al. Multimorbidity and quality of life: a closer look. Health and quality of life outcomes. 2007;5:52.

18. Tonelli M, Wiebe N, Fortin M, et al. Methods for identifying 30 chronic conditions: application to administrative data. BMC medical informatics and decision making. 2015;15:31.

19. Lynge E, Sandegaard JL, Rebolj M. The Danish National Patient Register. Scandinavian journal of public health. 2011;39(7 Suppl):30-3.

20. Mors O, Perto GP, Mortensen PB. The Danish Psychiatric Central Research Register. Scandinavian journal of public health. 2011;39(7 Suppl):54-7.

21. Gjerstorff ML. The Danish Cancer Registry. Scandinavian journal of public health. 2011;39(7 Suppl):42-5.

22. ICD-10, International Statistical Classification of Diseases and Related Health Problems 10th Revision, Intruction Maunal. World Health Orginazation, 2010.

Available from: <http://www.who.int/classifications/icd/ICD10Volume2_en_2010.pdf> [Last accessed: Dec 11, 2017].

23. Schmidt M, Schmidt SA, Sandegaard JL, et al. The Danish National Patient Registry: a review of content, data quality, and research potential. Clinical epidemiology. 2015;7:449-90.

24. Bock C, Bukh JD, Vinberg M, et al. Validity of the diagnosis of a single depressive episode in a case register. Clin Pract Epidemiol Ment Health. 2009;5:4.

25. Jakobsen KD, Frederiksen JN, Hansen T, et al. Reliability of clinical ICD-10 schizophrenia diagnoses. Nord J Psychiatry. 2005;59(3):209-12.

26. Larsen JR, Siersma VD, Davidsen AS, et al. The excess mortality of patients with diabetes and concurrent psychiatric illness is markedly reduced by structured personal diabetes care: A 19-year follow up of the randomized controlled study Diabetes Care in General Practice (DCGP). Gen Hosp Psychiatry. 2016;38:42-52.
